# Supplementary material
Source: publisher figshare collection journal article supplement (https://karger.figshare.com/ndownloader/files/12390611)
Supplement: Supplementary file 1 [file 12390611]

Table 1. Placental gene expression levels of cytokines and adhesion molecules in NP and PE

|  | 2-ΔCt | |
| --- | --- | --- |
|  | NP  (n=50) | PE  (n=50) |
| TNF-α | 3.3x10-3 (1.9x10-3-14.7x10-3) | 2.1x10-3 (1.7x10-3-3.3x10-3) |
| IL-6 | 3.8x10-3 (2.8x10-3-11.2x10-3) | 2.2x10-3 (1.3x10-3-3.1x10-3) |
| IL-8 | 5.4x10-3 (2.1x10-3-8.3x10-3) | 3.1x10-3 (2.1x10-3-7.1x10-3) |
| IL-10 | 3.3x10-3 (1.7x10-3-4.2x10-3) | 1.2x10-3 (0.7 x10-3-2.3x10-3)* |
| IL-1RA | 5.7x10-3 (3.8x10-3-1.1x10-2) | 1.6x10-3 (1.1x10-3-2.9x10-3)* |
| ICAM-1 | 2.3x10-3 (1.0x10-3-3.5x10-3) | 2.7x10-3 (0.8x10-3-3.3x10-3) |
| VCAM-1 | 2.8x10-2 (1.5x10-2-5.1x10-2) | 2.4x10-2 (1.2x10-2-3.6x10-2) |

**p* < 0.05 vs. NP

Table 2. Decidual gene expression levels of cytokines and adhesion molecules in NP and PE

|  | 2-ΔCt | |
| --- | --- | --- |
|  | NP  (n=50) | PE  (n=50) |
| TNF-α | 3.9x10-3 (2.4x10-3-6.1x10-3) | 4.2 x10-3(3.5x10-3-5.5x10-3) |
| IL-6 | 3.5x10-3 (1.6x10-3-12.3x10-3) | 1.4 x10-3 (1.0 x10-3-3.0 x10-3) |
| IL-8 | 2.4x10-2 (1.3x10-2-3.4x10-2) | 2.0x10-2 (0.7x10-2-3.2x10-2) |
| IL-10 | 4.1x10-3 (1.7x10-3-9.2x10-3) | 7.0 x10-3 (3.6 x10-3-8.6 x10-3) |
| IL-1RA | 4.1x10-3 (1.8x10-3-5.7x10-3) | 3.0 x10-3 (1.8 x10-3-5.1 x10-3) |
| ICAM-1 | 1.7x10-3 (0.7x10-3-2.7x10-3) | 1.4x10-3 (1.0 x10-3-2.4 x10-3) |
| VCAM-1 | 2.6x10-2 (0.3x10-2-8.8x10-2) | 4.5x10-2 (3.1x10-2-12.4x10-2) |
